# Supplementary material for: Synthesis and Characterization of Chitosan-Coated Near-Infrared (NIR) Layered Double Hydroxide-Indocyanine Green Nanocomposites for Potential Applications in Photodynamic Therapy
Source: PubMed Central journal article supplement (PMC4611849; doi:10.3390/ijms160920943), 2015-09-01
Supplement: ijms-16-20943-s001.pdf [file ijms-16-20943-s001.pdf]

## Supplementary Information

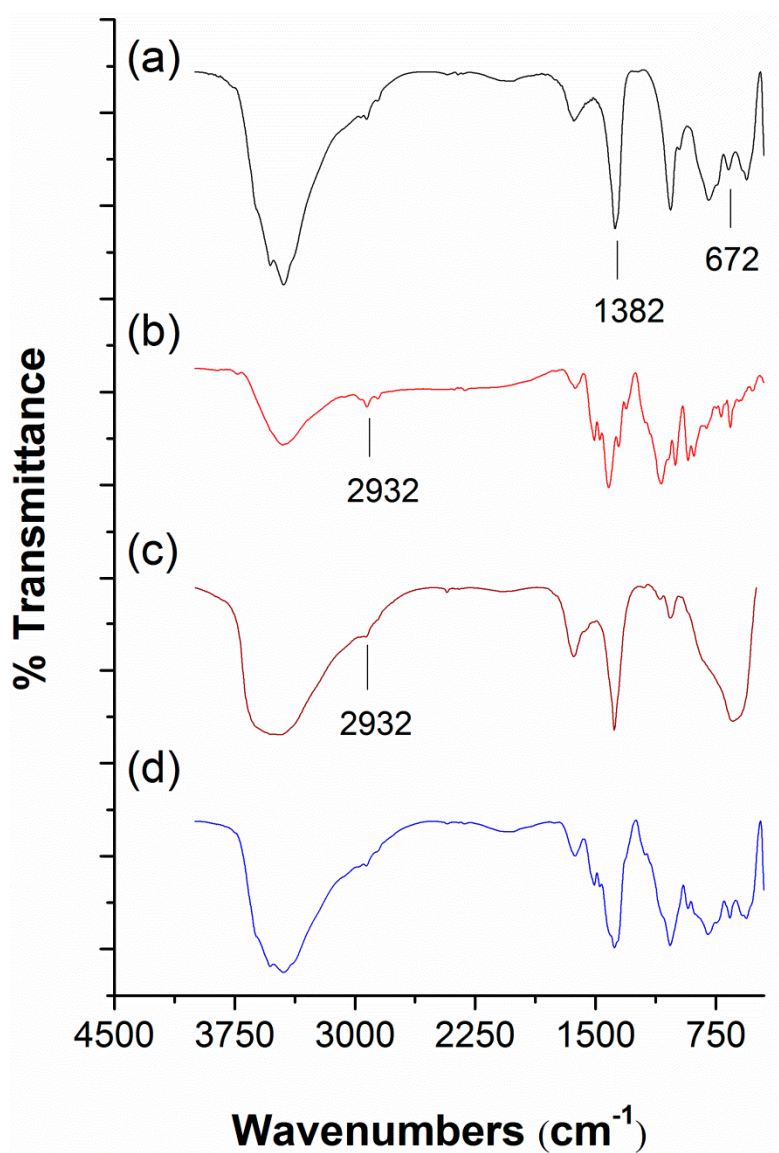

**Figure S1.** FT-IR spectra of (a) LDH; (b) ICG; (c) LDHs-NH<sub>2</sub>-ICG and (d) physical mixture of LDHs-NH<sub>2</sub> and ICG.

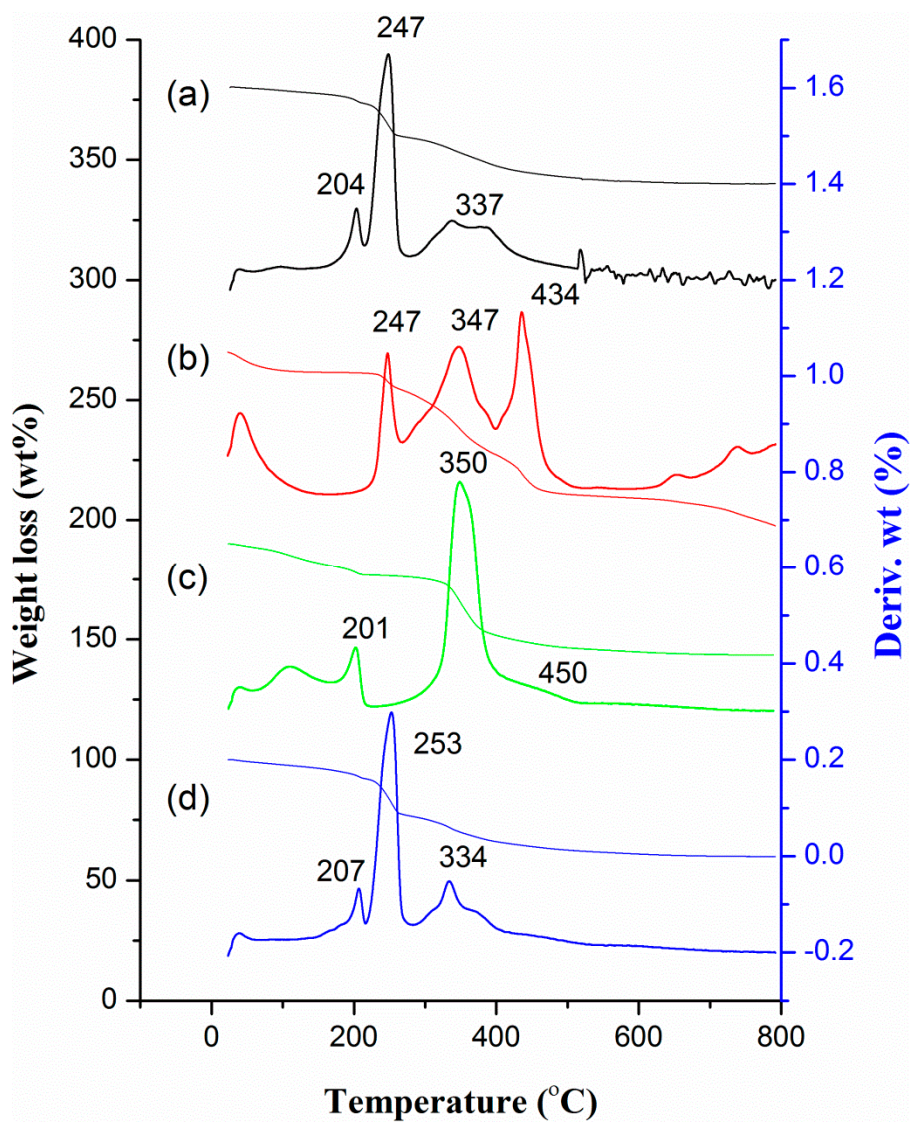

**Figure S2.** TGA curves of (a) LDH; (b) ICG; (c) LDHs-NH<sub>2</sub>-ICG and (d) physical mixture of LDHs-NH<sub>2</sub> and ICG.
